# Supplementary material for: Metabolic Effects of Anti-TNF-α Treatment in Rheumatoid Arthritis
Source: MDPI journal article supplement (doi:10.3390/diseases11040164), 2023-11-09
Supplement: s1 [file s1]

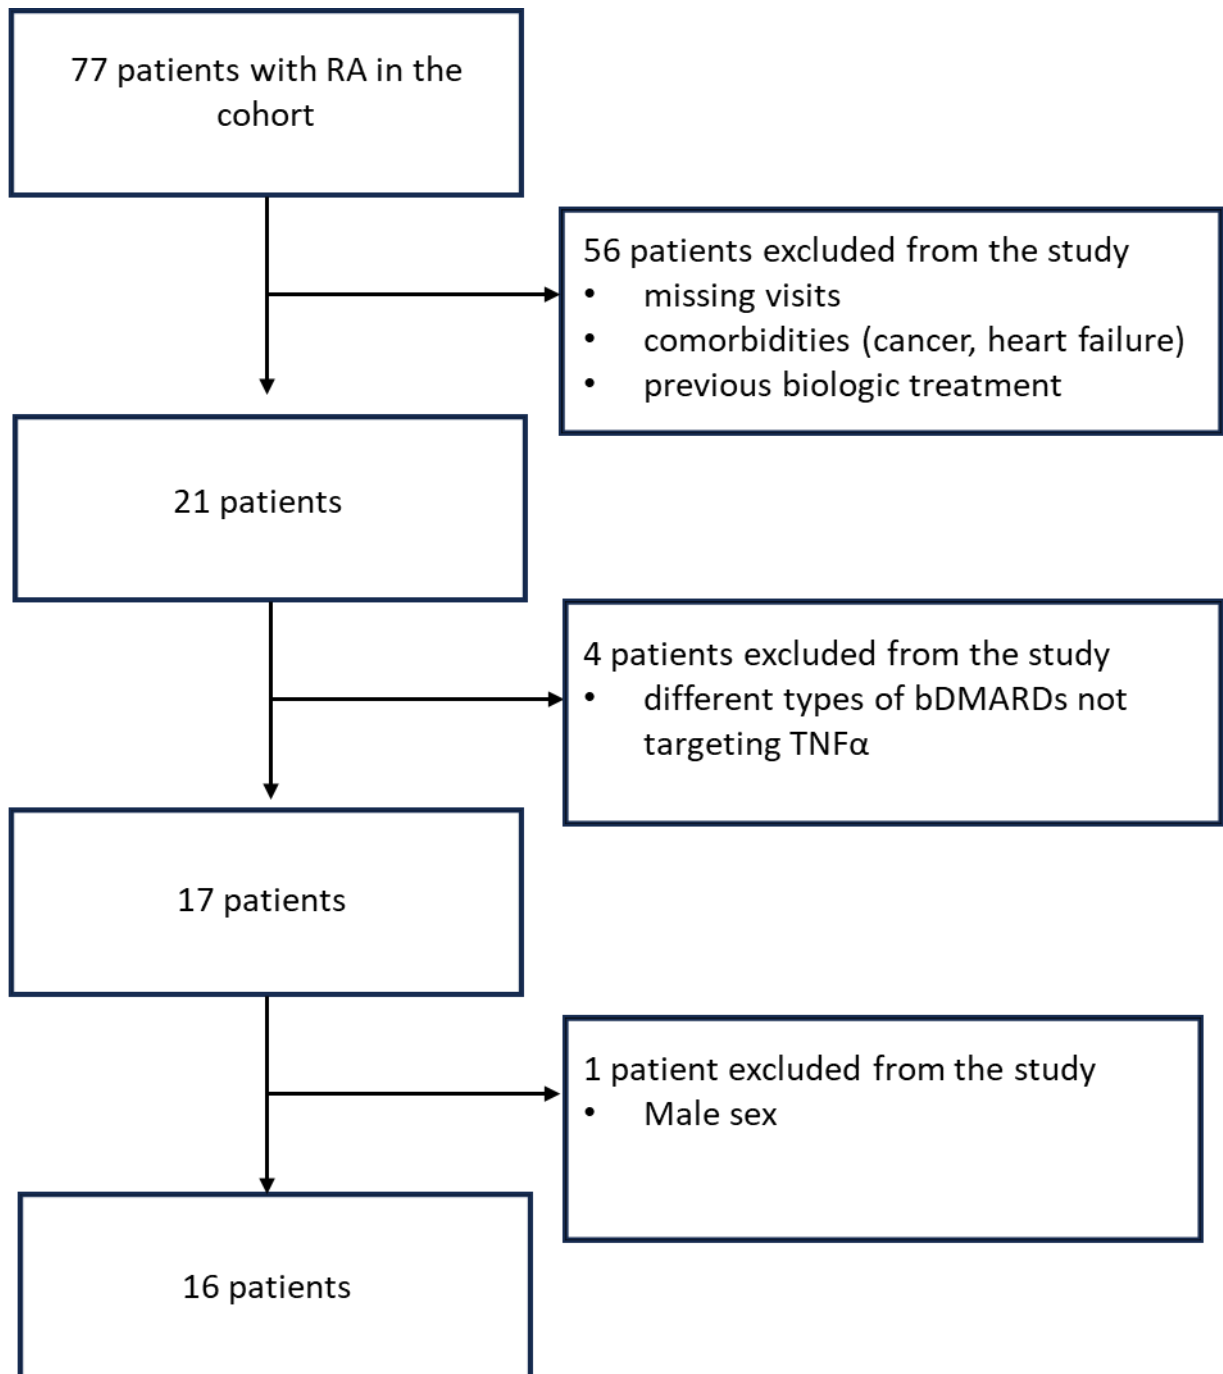

**Supplementary Figure S1.** Flow chart of patients after the application of the exclusion criteria
